# Supplementary material for: Reversible photodimerization of coumarin-modified Wells–Dawson anions
Source: Royal Society of Chemistry journal article supplement (doi:10.1039/c5tc00379b), 2015-01-01
Supplement: c5tc00379b1.pdf [file c5tc00379b1.pdf]

Supporting information for

## **Reversible Photodimerization of Coumarin-Modified Wells-Dawson Anions**

Wei Chen,<sup>a</sup> UnSong Tong,<sup>a</sup> Tao Zeng,<sup>a</sup> Carsten Streb<sup>\*b</sup> and Yu-Fei Song<sup>\*</sup>

[a] State Key Laboratory of Chemical Resource Engineering, Beijing University of Chemical Technology, 100029 Beijing, P.R. China.

[b] Institute of Inorganic Chemistry I, Ulm University, Albert-Einstein-Allee 11, 89081 Ulm, Germany.

### **List of Contents**

1. <sup>1</sup>H NMR and <sup>31</sup>P NMR spectroscopy of compound **4**
2. FT-IR spectroscopy of compound **1-3**
3. ESI-MS of compound **1** and **2**
4. TEM images of the dimer particles after photo-irradiation of compound **4**.

## 1. $^1\text{H}$ NMR and $^{31}\text{P}$ NMR spectroscopy of compound 4

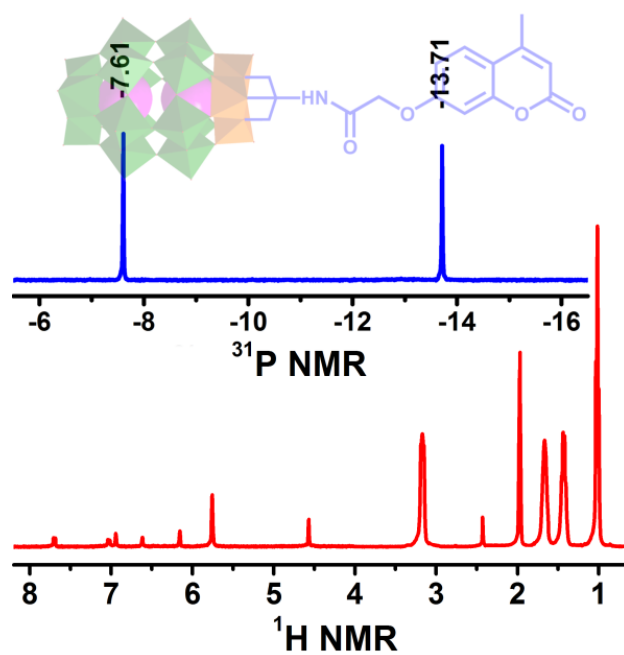

Figure S1. a)  $^1\text{H}$  NMR and b)  $^{31}\text{P}$  NMR of compound 4.

## 2. FT-IR spectroscopy

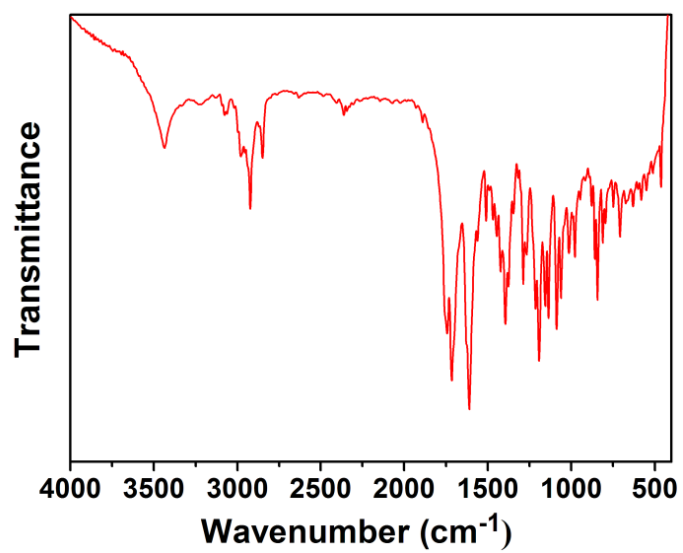

Figure S2. FT-IR of compound 1.

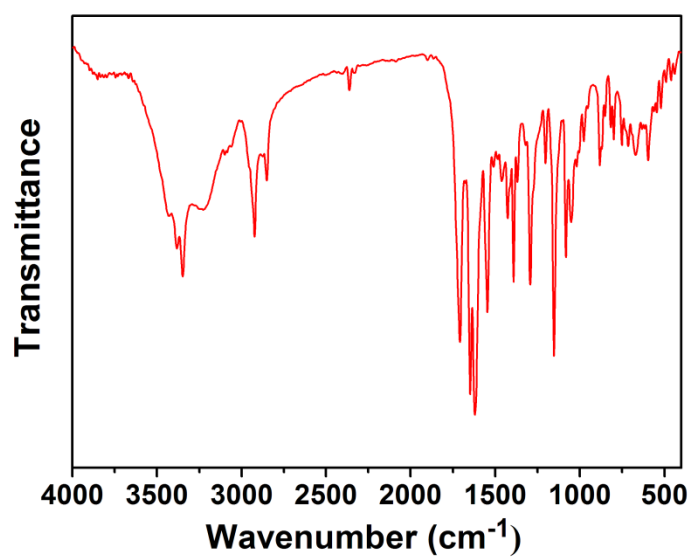

Figure S3. FT-IR of compound 2.

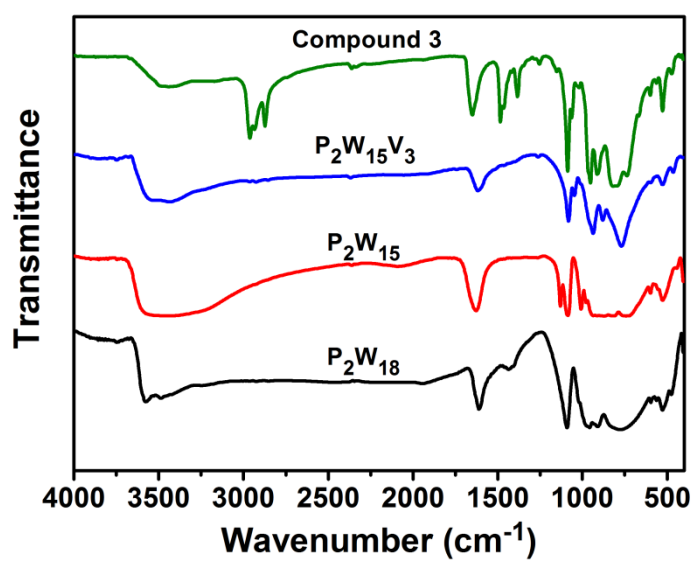

Figure S4. FT-IR of compound 3.

### 3. ESI-MS of compound 1 and 2

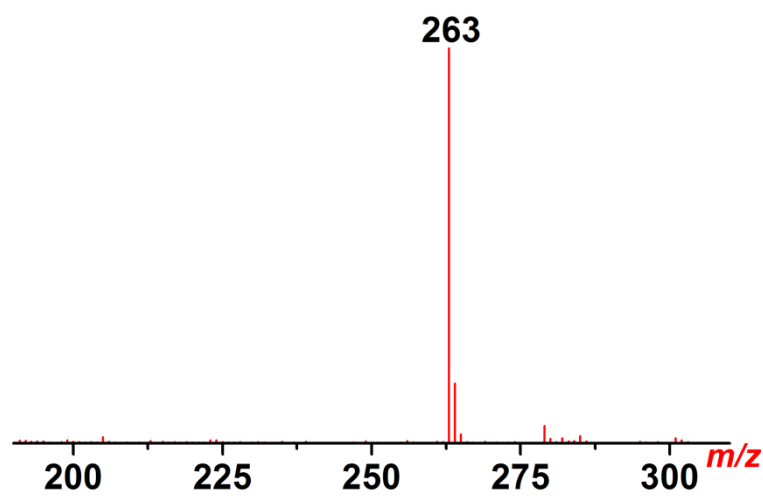

Figure S5. ESI-MS of compound 1.

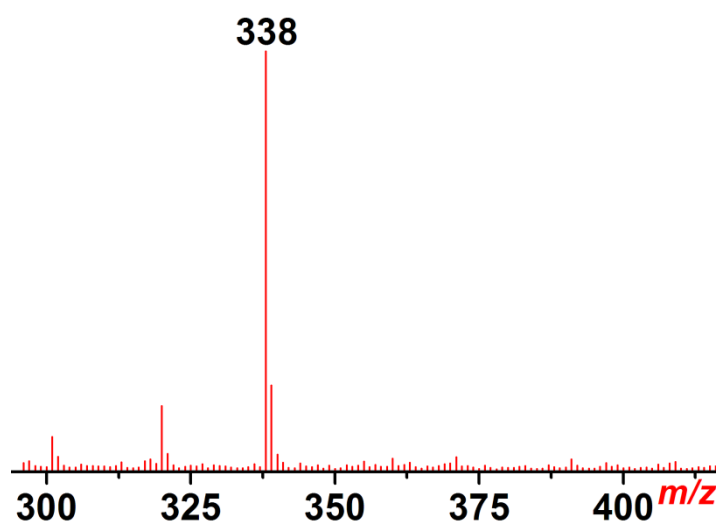

Figure S6. ESI-MS of compound 2.

### 4. TEM images of the dimer particles after photo-irradiation of compound 4.

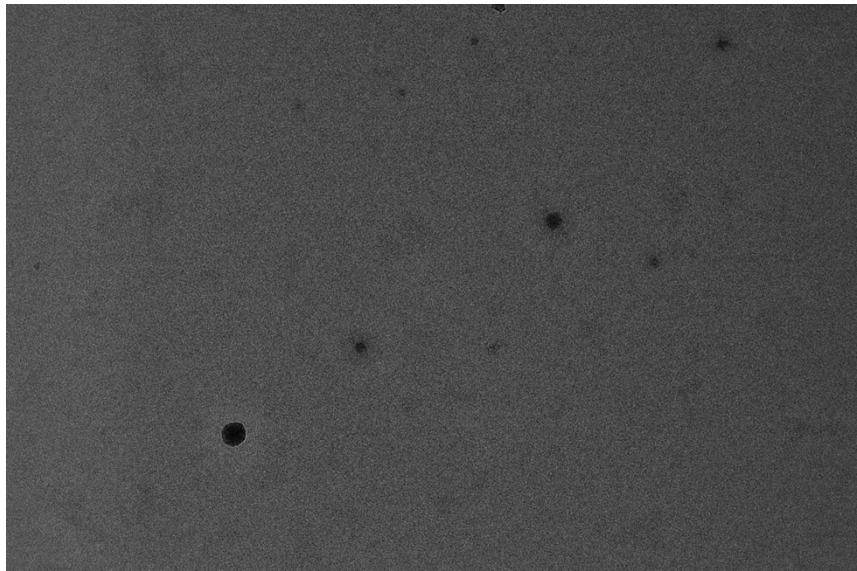

| Microscope | Accelerating Voltage | Magnification | Camera Length |
|------------|----------------------|---------------|---------------|
| Tecnai     | 200 kV               | 38000 x       | - 250 nm -    |

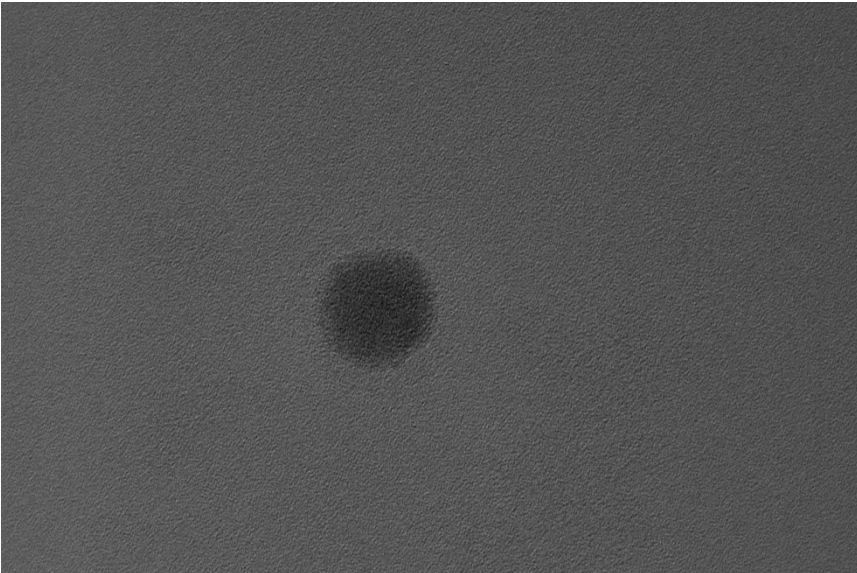

| Microscope | Accelerating Voltage | Magnification | Camera Length |
|------------|----------------------|---------------|---------------|
| Tecnai     | 200 kV               | 195000 x      | - 50 nm -     |
